# Supplementary material
Source: Springer Nature journal article supplement (https://www.springermedizin.de/resource/supplementary/13223_2011_308_MOESM3_ESM.pdf/9597526)

CMP-specific IgG1

CMP-specific IgG2a

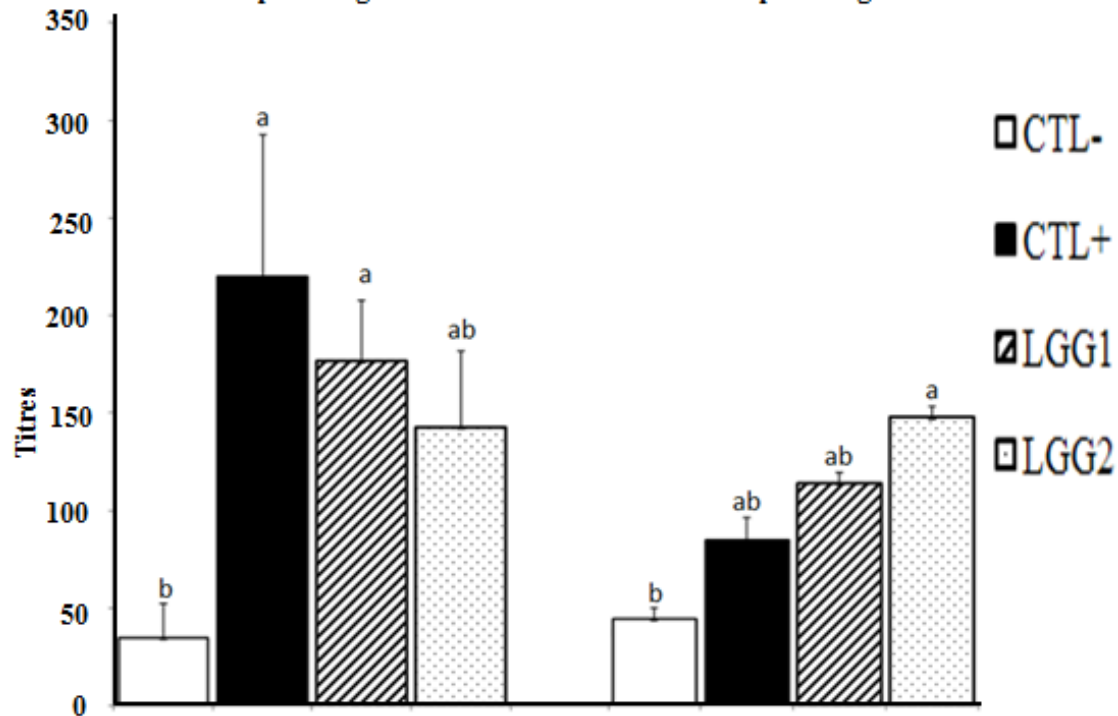

Supplement: MOESM3 [file 9597526]
